# Supplementary material for: A Robust Protocol for Decellularized Human Lung Bioink Generation Amenable to 2D and 3D Lung Cell Culture
Source: MDPI journal article supplement (doi:10.3390/cells10061538), 2021-06-18
Supplement: s1 [file s1]

## A robust protocol for decellularized human lung bioink generation amenable to 2D and 3D lung cell culture

(a) Intact tissue

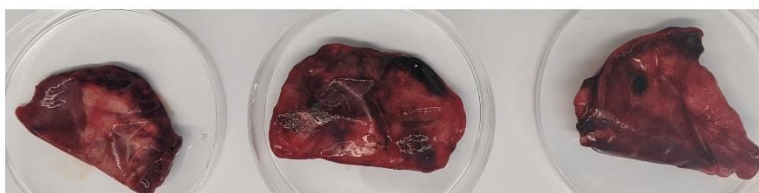

(b) Cutting to smaller pieces

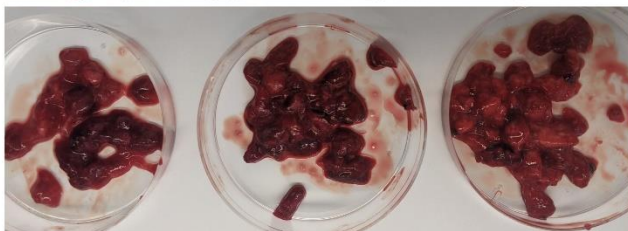

(c) After washing with Triton X 0.1%

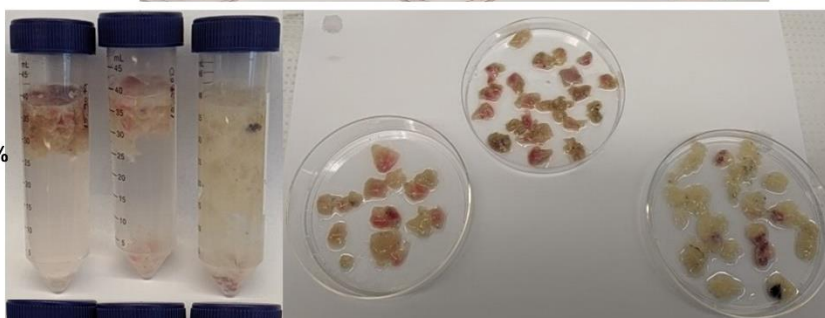

(d) After washing with SDC

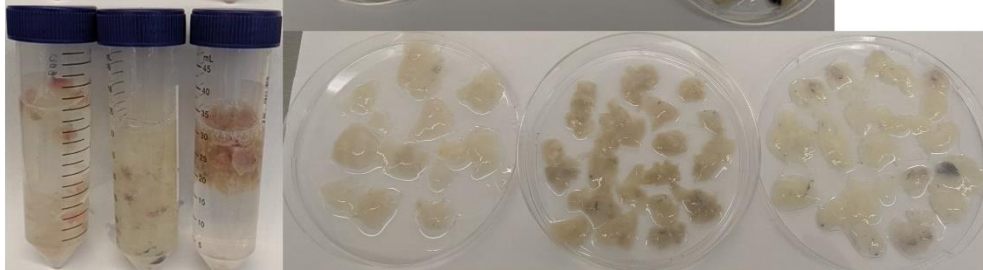

(e) After final PBS wash

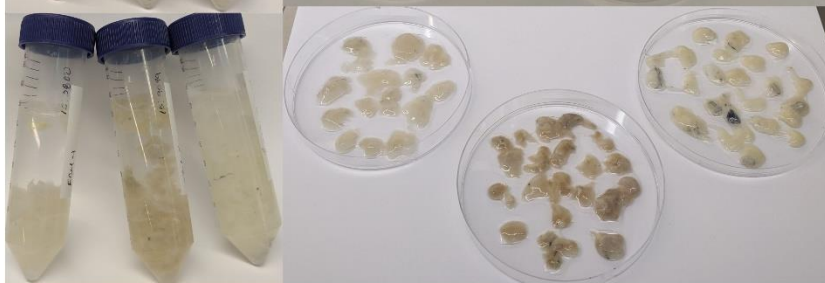

(f) Lyophilized samples

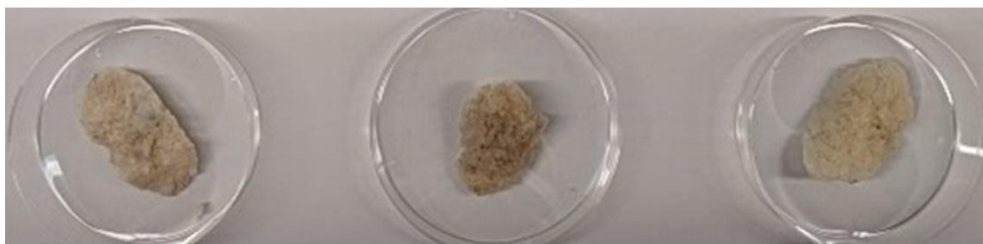

*Figure S1: macroscopic images from various decellularization process steps*

|                           | Slope | $t_{1/2}$ | $t_{95\%}$ | $t_{lag}$ |
|---------------------------|-------|-----------|------------|-----------|
| 10.0 mg/mL vs. 12.5 mg/mL | ns    | ns        | ns         | ns        |
| 10.0 mg/mL vs. 15.0 mg/mL | ns    | ns        | ns         | ns        |
| 10.0 mg/mL vs. 17.5 mg/mL | ns    | ns        | ns         | ns        |
| 10.0 mg/mL vs. 20.0 mg/mL | *     | **        | ****       | **        |
| 12.5 mg/mL vs. 15.0 mg/mL | ns    | ns        | ns         | ns        |
| 12.5 mg/mL vs. 17.5 mg/mL | ns    | ns        | **         | *         |
| 12.5 mg/mL vs. 20.0 mg/mL | *     | *         | ****       | **        |
| 15.0 mg/mL vs. 17.5 mg/mL | ns    | ns        | *          | ns        |
| 15.0 mg/mL vs. 20.0 mg/mL | **    | **        | ****       | **        |
| 17.5 mg/mL vs. 20.0 mg/mL | ns    | ns        | **         | ns        |

Figure S2: A summary of statistical analysis and p-values for calculated turbidimetric gelation kinetics parameters in Table 1. \*  $p \leq 0.05$ , \*\*  $p \leq 0.01$ , and \*\*\*\*  $p \leq 0.0001$

|                           | G' | G'' |
|---------------------------|----|-----|
| 10.0 mg/mL vs. 12.5 mg/mL | ns | ns  |
| 10.0 mg/mL vs. 15.0 mg/mL | ns | ns  |
| 10.0 mg/mL vs. 17.5 mg/mL | *  | *   |
| 10.0 mg/mL vs. 20.0 mg/mL | ** | **  |
| 12.5 mg/mL vs. 15.0 mg/mL | ns | ns  |
| 12.5 mg/mL vs. 17.5 mg/mL | ns | ns  |
| 12.5 mg/mL vs. 20.0 mg/mL | *  | *   |
| 15.0 mg/mL vs. 17.5 mg/mL | ns | ns  |
| 15.0 mg/mL vs. 20.0 mg/mL | ns | *   |
| 17.5 mg/mL vs. 20.0 mg/mL | ns | ns  |

Figure S3: A summary of statistical analysis and p-values for  $G'$  and  $G''$  in Figure 3e. \*  $p \leq 0.05$  and \*\*  $p \leq 0.01$ .

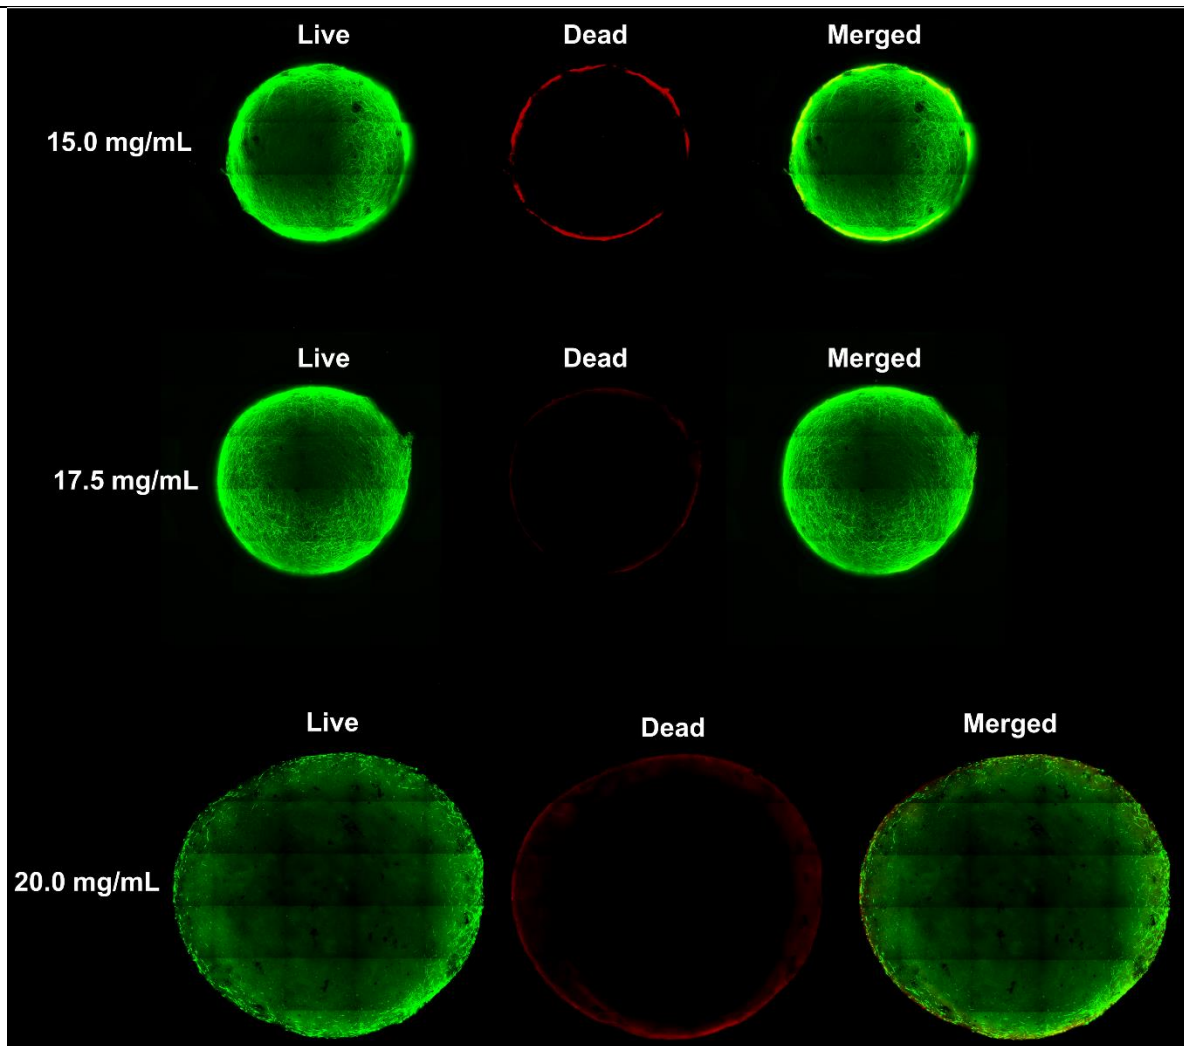

*Figure S4: Viability assays of cells incubated inside dECM hydrogels using the live and dead assay.*

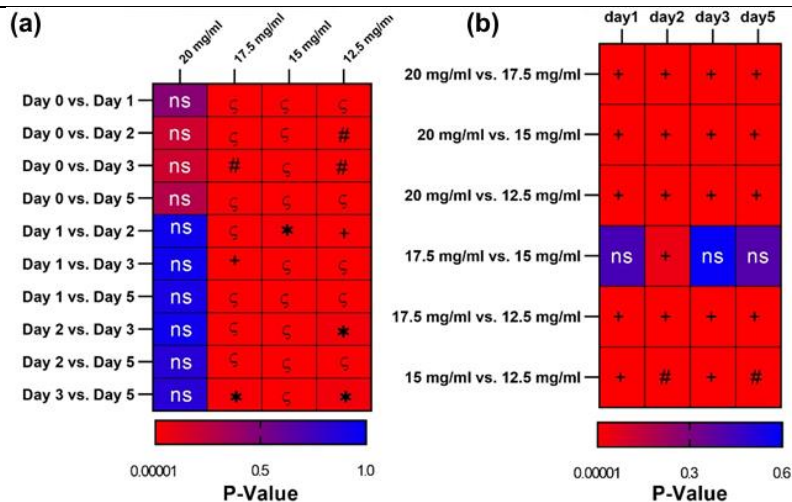

Figure S5: (a) heat map of the p-values for each hydrogel over five days: this graph shows if the change in the diameter of the hydrogel is significantly changed over time and (b) heat map of the p-values analysis for hydrogels compared to each other over five days of 3D culture. P-Values: \* denotes for p values smaller than 0.05, ζ denotes for p values smaller than 0.005, # denotes for p values smaller than 0.001, + denotes for p values smaller than 0.0001.
